# Supplementary material
Source: PubMed Central journal article supplement (PMC7906119)
Supplement: CanJDentHyg-55-1-57-a-appendix1.pdf [file CanJDentHyg-55-1-57-a-appendix1.pdf]

**ACKNOWLEDGEMENTS**

This position paper was funded by the Canadian Dental Hygienists Association. Both authors received an honorarium for this work. We wish to thank the CDHA steering committee for their valuable input and guidance throughout the development of this paper.

**CONFLICTS OF INTEREST**

The authors have declared no conflicts of interest.

**APPENDIX A: THE BRADFORD HILL CRITERIA FOR CAUSALITY**

| Criteria                            | Meaning                                                                                                                                                                                                                                                                                                                                                                                                                                                                                                                                          |
|-------------------------------------|--------------------------------------------------------------------------------------------------------------------------------------------------------------------------------------------------------------------------------------------------------------------------------------------------------------------------------------------------------------------------------------------------------------------------------------------------------------------------------------------------------------------------------------------------|
| Strength of association             | A strong association is more likely to have a causal component than is a modest association. Strength of the association is determined by the types of existing studies. The highest level studies from the evidence pyramid would represent the strongest associations (i.e., RCTs and systematic reviews with meta-analyses) Results from these studies must demonstrate an odds ratio or relative risk of at least 2.0 or above in order to be meaningful. Anything between 1 and 2 is weak while >2 is moderate and >4 is considered strong. |
| Consistency                         | A relationship is repeatedly observed in all available studies.                                                                                                                                                                                                                                                                                                                                                                                                                                                                                  |
| Specificity                         | A factor influences specifically a particular outcome or population. The more specific an association between a factor and an effect, the greater the probability that it is causal.                                                                                                                                                                                                                                                                                                                                                             |
| Temporality                         | The cause must precede the outcome it is assumed to affect (e.g., smoking before the appearance of lung cancer). Outcome measured over time (longitudinal study).                                                                                                                                                                                                                                                                                                                                                                                |
| Biological gradient (dose–response) | The outcome increases monotonically with increasing dose of exposure or according to a function predicted by a substantive theory (e.g., the more cigarettes one smokes, the greater the chance of the cancer occurring).                                                                                                                                                                                                                                                                                                                        |
| Plausibility                        | The observed association can be plausibly explained by substantive matter (i.e., biologically possible).                                                                                                                                                                                                                                                                                                                                                                                                                                         |
| Coherence                           | A causal conclusion should not fundamentally contradict present substantive knowledge. (Studies must not contradict each other.)                                                                                                                                                                                                                                                                                                                                                                                                                 |
| Experiment                          | Causation is more likely if evidence is based on randomized experiments or a systematic review of randomized experiments. However, these RCTs may not be ethically possible and thus prospective rather than experimental studies, such as cohort studies, may be the highest level of evidence available.                                                                                                                                                                                                                                       |
| Analogy                             | For analogous exposures & outcomes an effect has already been shown (e.g., effects first demonstrated on animals or an effect previously occurring on humans such as the effects of thalidomide on a fetus during pregnancy).                                                                                                                                                                                                                                                                                                                    |

Source: Lavigne SE. From Evidence to Causality: How Do We Determine Causality? [Online course]. 2018. Available from: [www.dentalcare.com/en-us/professional-education/ce-courses/ce530](http://www.dentalcare.com/en-us/professional-education/ce-courses/ce530)

**APPENDIX B: EXCLUDED STUDIES AND REASONS FOR EXCLUSION**

|    | Author                      | Year | Study type                   | Reason for exclusion                                              |
|----|-----------------------------|------|------------------------------|-------------------------------------------------------------------|
| 1  | Abariga SA <sup>35</sup>    | 2016 | SR of observational studies  | RCTs not included                                                 |
| 2  | Borell LN <sup>36</sup>     | 2011 | Critical summary             | Summary, not an actual study                                      |
| 3  | Borgnakke WS <sup>2</sup>   | 2013 | SR of observational studies  | RCTs not included                                                 |
| 4  | Boyd L <sup>37</sup>        | 2012 | Literature review            | Not a SR or MA                                                    |
| 5  | Cao R <sup>38</sup>         | 2019 | SR, network MA               | Network study and included antibiotics                            |
| 6  | Darré L <sup>39</sup>       | 2008 | MA of interventional studies | Mixture of controlled and non-controlled studies and were too old |
| 7  | Engebretson S <sup>16</sup> | 2013 | SR/MA                        | Included a mixture of treatment modalities not just NSPT          |
| 8  | Grellmann AP <sup>40</sup>  | 2016 | MA                           | Adjuvant antimicrobials main focus                                |
| 9  | Hsu Y-T <sup>41</sup>       | 2019 | SR of cohort studies         | RCTs not included and outcome measure not HbA1c                   |
| 10 | Janket S-J <sup>42</sup>    | 2014 | Critical summary             | Summary, not an actual study                                      |
| 11 | Liccardo D <sup>43</sup>    | 2019 | Literature review            | Not a SR or MA                                                    |
| 12 | Liew AKC <sup>44</sup>      | 2013 | MA                           | Included mixed interventions/ antimicrobials                      |
| 13 | Lima RPE <sup>45</sup>      | 2018 | SR                           | Different outcome measures                                        |
| 14 | Lira Junior R <sup>46</sup> | 2017 | SR                           | All studies combined SRP with antibiotics                         |
| 15 | Madianos PN <sup>47</sup>   | 2018 | Review of MAs                | Mixture of T1 and T2; antibiotics                                 |
