# Supplementary material
Source: PubMed Central journal article supplement (PMC7906119)
Supplement: CanJDentHyg-55-1-57-a-appendix2.pdf [file CanJDentHyg-55-1-57-a-appendix2.pdf]

**ACKNOWLEDGEMENTS**

This position paper was funded by the Canadian Dental Hygienists Association. Both authors received an honorarium for this work. We wish to thank the CDHA steering committee for their valuable input and guidance throughout the development of this paper.

**CONFLICTS OF INTEREST**

The authors have declared no conflicts of interest.

**APPENDIX A: THE BRADFORD HILL CRITERIA FOR CAUSALITY**

| Criteria                            | Meaning                                                                                                                                                                                                                                                                                                                                                                                                                                                                                                                                          |
|-------------------------------------|--------------------------------------------------------------------------------------------------------------------------------------------------------------------------------------------------------------------------------------------------------------------------------------------------------------------------------------------------------------------------------------------------------------------------------------------------------------------------------------------------------------------------------------------------|
| Strength of association             | A strong association is more likely to have a causal component than is a modest association. Strength of the association is determined by the types of existing studies. The highest level studies from the evidence pyramid would represent the strongest associations (i.e., RCTs and systematic reviews with meta-analyses) Results from these studies must demonstrate an odds ratio or relative risk of at least 2.0 or above in order to be meaningful. Anything between 1 and 2 is weak while >2 is moderate and >4 is considered strong. |
| Consistency                         | A relationship is repeatedly observed in all available studies.                                                                                                                                                                                                                                                                                                                                                                                                                                                                                  |
| Specificity                         | A factor influences specifically a particular outcome or population. The more specific an association between a factor and an effect, the greater the probability that it is causal.                                                                                                                                                                                                                                                                                                                                                             |
| Temporality                         | The cause must precede the outcome it is assumed to affect (e.g., smoking before the appearance of lung cancer). Outcome measured over time (longitudinal study).                                                                                                                                                                                                                                                                                                                                                                                |
| Biological gradient (dose–response) | The outcome increases monotonically with increasing dose of exposure or according to a function predicted by a substantive theory (e.g., the more cigarettes one smokes, the greater the chance of the cancer occurring).                                                                                                                                                                                                                                                                                                                        |
| Plausibility                        | The observed association can be plausibly explained by substantive matter (i.e., biologically possible).                                                                                                                                                                                                                                                                                                                                                                                                                                         |
| Coherence                           | A causal conclusion should not fundamentally contradict present substantive knowledge. (Studies must not contradict each other.)                                                                                                                                                                                                                                                                                                                                                                                                                 |
| Experiment                          | Causation is more likely if evidence is based on randomized experiments or a systematic review of randomized experiments. However, these RCTs may not be ethically possible and thus prospective rather than experimental studies, such as cohort studies, may be the highest level of evidence available.                                                                                                                                                                                                                                       |
| Analogy                             | For analogous exposures & outcomes an effect has already been shown (e.g., effects first demonstrated on animals or an effect previously occurring on humans such as the effects of thalidomide on a fetus during pregnancy).                                                                                                                                                                                                                                                                                                                    |

Source: Lavigne SE. From Evidence to Causality: How Do We Determine Causality? [Online course]. 2018. Available from: [www.dentalcare.com/en-us/professional-education/ce-courses/ce530](http://www.dentalcare.com/en-us/professional-education/ce-courses/ce530)

**APPENDIX B: EXCLUDED STUDIES AND REASONS FOR EXCLUSION**

|    | Author                      | Year | Study type                   | Reason for exclusion                                              |
|----|-----------------------------|------|------------------------------|-------------------------------------------------------------------|
| 1  | Abariga SA <sup>35</sup>    | 2016 | SR of observational studies  | RCTs not included                                                 |
| 2  | Borell LN <sup>36</sup>     | 2011 | Critical summary             | Summary, not an actual study                                      |
| 3  | Borgnakke WS <sup>2</sup>   | 2013 | SR of observational studies  | RCTs not included                                                 |
| 4  | Boyd L <sup>37</sup>        | 2012 | Literature review            | Not a SR or MA                                                    |
| 5  | Cao R <sup>38</sup>         | 2019 | SR, network MA               | Network study and included antibiotics                            |
| 6  | Darré L <sup>39</sup>       | 2008 | MA of interventional studies | Mixture of controlled and non-controlled studies and were too old |
| 7  | Engebretson S <sup>16</sup> | 2013 | SR/MA                        | Included a mixture of treatment modalities not just NSPT          |
| 8  | Grellmann AP <sup>40</sup>  | 2016 | MA                           | Adjuvant antimicrobials main focus                                |
| 9  | Hsu Y-T <sup>41</sup>       | 2019 | SR of cohort studies         | RCTs not included and outcome measure not HbA1c                   |
| 10 | Janket S-J <sup>42</sup>    | 2014 | Critical summary             | Summary, not an actual study                                      |
| 11 | Liccardo D <sup>43</sup>    | 2019 | Literature review            | Not a SR or MA                                                    |
| 12 | Liew AKC <sup>44</sup>      | 2013 | MA                           | Included mixed interventions/ antimicrobials                      |
| 13 | Lima RPE <sup>45</sup>      | 2018 | SR                           | Different outcome measures                                        |
| 14 | Lira Junior R <sup>46</sup> | 2017 | SR                           | All studies combined SRP with antibiotics                         |
| 15 | Madianos PN <sup>47</sup>   | 2018 | Review of MAs                | Mixture of T1 and T2; antibiotics                                 |

## APPENDIX B: continued

|    | Author                            | Year | Study type       | Reason for exclusion                           |
|----|-----------------------------------|------|------------------|------------------------------------------------|
| 16 | Mauri-Obradors E <sup>48</sup>    | 2013 | SR               | Mixture of non-RCTs and RCTs                   |
| 17 | Rodriguez-Medina CR <sup>49</sup> | 2015 | Critical summary | Summary, not an actual study                   |
| 18 | Mizuno H <sup>50</sup>            | 2017 | RCT              | Not a SR or MA                                 |
| 19 | Papageorgiou SN <sup>51</sup>     | 2015 | SR/MA            | Obesity, not diabetes                          |
| 20 | Rovai ES <sup>52</sup>            | 2016 | SR               | Local antimicrobials not SRP                   |
| 21 | Santos CMM <sup>53</sup>          | 2015 | SR               | Included antibiotics                           |
| 22 | Souto MLS <sup>54</sup>           | 2018 | SR/MA            | Main intervention antibiotics                  |
| 23 | Sun Q <sup>55</sup>               | 2014 | MA of RCTs       | Included antimicrobials                        |
| 24 | Taylor G <sup>56</sup>            | 2007 | Critical summary | Summary, not an actual study                   |
| 25 | Torumtay G <sup>57</sup>          | 2016 | RCT              | Not a SR or MA                                 |
| 26 | Teeuw WJ <sup>17</sup>            | 2010 | SR/MA            | Included studies older than 2007 & antibiotics |
| 27 | Teeuw WJ <sup>58</sup>            | 2014 | SR/MA            | N/A unrelated topic                            |
| 28 | Teshome A <sup>59</sup>           | 2017 | SR/MA            | Included antibiotics                           |
| 29 | Wang X <sup>60</sup>              | 2014 | SR/MA            | Mixture of T1 and T2; antibiotics              |
| 30 | Wang T-F <sup>18</sup>            | 2014 | MA               | Compared SRP with SRP with Doxy                |
| 31 | D'Aiuto F <sup>61</sup>           | 2017 | Review           | Evidence summary                               |

## REFERENCES

- Public Health Agency of Canada (PHAC). *Diabetes in Canada: Highlights from the Canadian Chronic Disease Surveillance System*. Cat.: HP35-94/2017E-PDF | ISBN: 978-0-660-23635-3 | Pub.: 170260
- Borgnakke WS, Ylöstalo PV, Taylor GW, Genco RJ. Effect of periodontal disease on diabetes: Systematic review of epidemiological observational evidence. *J Periodontol*. 2013;84(4 Suppl.):S135–S152.
- Caton JG, Armitage G, Berglundh T, Chapple ILC, Jepsen S, Kornman KS, et al. A new classification scheme for periodontal and peri-implant diseases and conditions—Introduction and key changes from the 1999 classification. *J Periodontol*. 2018;89(Suppl 1):S1–S8.
- Tonetti MS, Greenwell H, Kornman KS. Staging and grading of periodontitis: Framework and proposal of a new classification and case definition. *J Periodontol*. 2018;89(Suppl 1):S159–S172.
- Genco RJ, Graziani F, Hasturk H. Effects of periodontal disease on glycemic control, complications, and incidence of diabetes mellitus. *Periodontology 2000*. 2020;83:59–65.
- Winning L, Linden GJ. Periodontitis and systemic disease: Association or causality? *Curr Oral Health Rep*. 2017;4:1–7.
- Taylor GW. Bidirectional interrelationships between diabetes and periodontal diseases: an epidemiological perspective. *Ann Periodontol*. 2001;6(1):99–112.
- Borgnakke WS. IDF Diabetes Atlas: Diabetes and oral health—A two-way relationship of clinical importance. *Diabetes Res Clin Pract*. 2019;157:107839.
- Linden GJ, Herzberg MC, Working Grp 4 Joint EFPAAPPW. Periodontitis and systemic diseases: A record of discussions of working group 4 of the Joint EFP/AAP Workshop on Periodontitis and Systemic Diseases. *J Clin Periodontol*. 2013;40:S20–S23.
- Lux J. Review of the oral disease–systemic disease link. Part 1: Heart disease, diabetes. *Can J Dent Hyg*. 2006;40(6):288–302.
- Lavigne SE, Forrest JL. An umbrella review of systematic reviews of the evidence of a causal relationship between periodontal disease and cardiovascular diseases: Position paper from the Canadian Dental Hygienists Association. *Can J Dent Hyg*. 2020;54(1):32–41.
- Lavigne SE, Forrest JL. An umbrella review of systematic reviews of the evidence of a causal relationship between periodontal disease and adverse pregnancy outcomes: Position paper from the Canadian Dental Hygienists Association. *Can J Dent Hyg*. 2020;54(2):92–100.
- Lavigne SE, Forrest JL. An umbrella review of systematic reviews of the state of the evidence of a causal relationship between periodontal microbes and respiratory diseases: Position paper from the Canadian Dental Hygienists Association. *Can J Dent Hyg*. 2020;54(3):144–55.
- Hill AB. The environment and disease: Association or causation? *Proc Royal Soc Med*. 1965;58:295–300.
- Simpson TC, Weldon JC, Worthington HV, Needleman I, Wild SH, Moles DR, et al. Treatment of periodontal disease for glycaemic control in people with diabetes mellitus (Review). *Cochrane Database Syst Rev*. 2015;11:Art.No. CD004714.
- Engebretson S, Kocher T. Evidence that periodontal treatment improves diabetes outcomes: a systematic review and meta-analysis. *J Clin Periodontol*. 2013;40(Suppl. 14):S153–S163.
- Teeuw WJ, Gerdes VEA, Loos BG. Effect of periodontal treatment on glycemic control of diabetic patients. *Diabetes Care*. 2010;33(2):421–27.
- Wang T-F, Jen I-A, Chou C, Lei Y-P. Effects of periodontal therapy on metabolic control in patients with type 2 diabetes mellitus and periodontal disease: A meta-analysis. *Medicine (Baltimore)*. 2014;93(28):e292.
